# Supplementary material for: IDegLira Versus Insulin Glargine U100: A Long-term Cost-effectiveness Analysis in the US Setting
Source: Springer Nature journal article supplement (doi:10.1007/s13300-017-0251-x), 2017-03-27
Supplement: MOESM1 [file 12179928]

## APPENDIX: HBA1C PROGRESSION

### Base case analysis

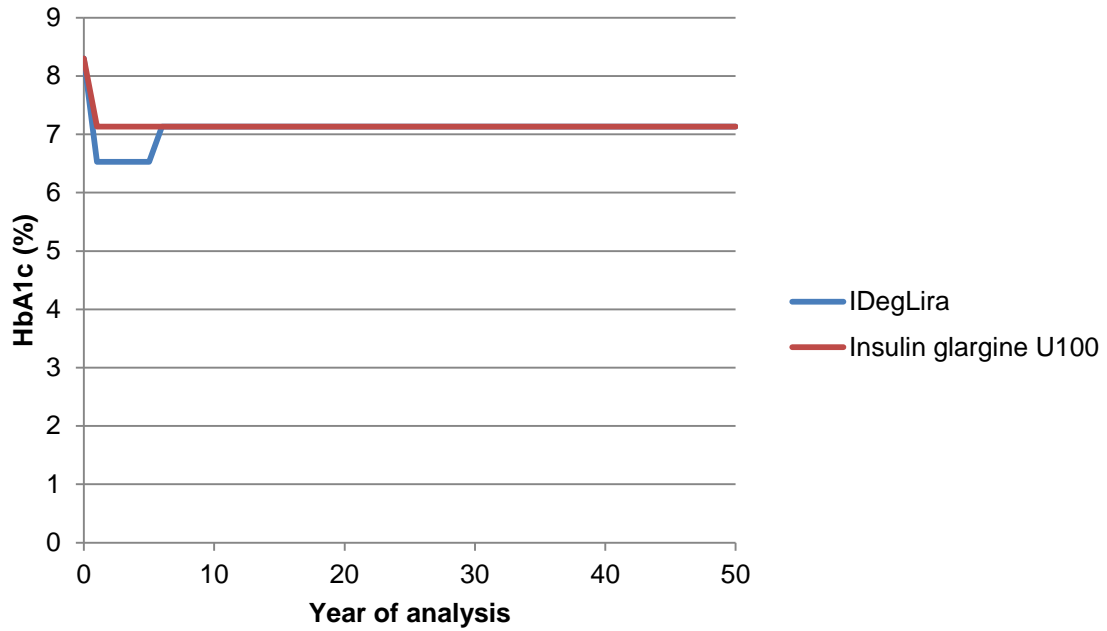

HbA1c, glycated hemoglobin.

### Sensitivity analysis with HbA1c differences maintained

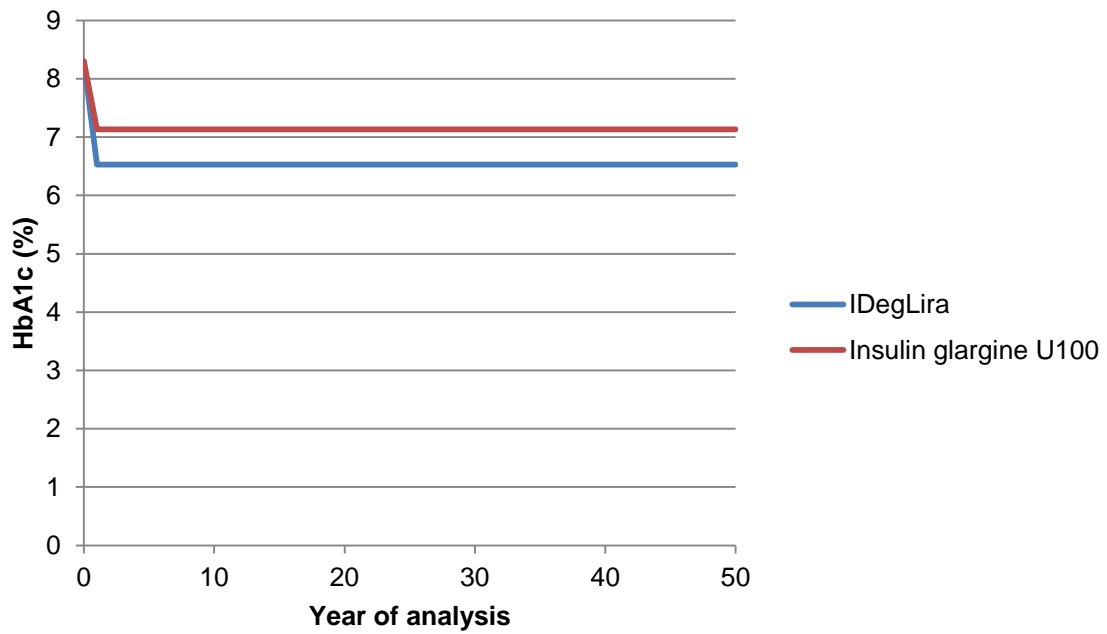

HbA1c, glycated hemoglobin.

### Sensitivity analysis with UKPDS HbA1c progression equation

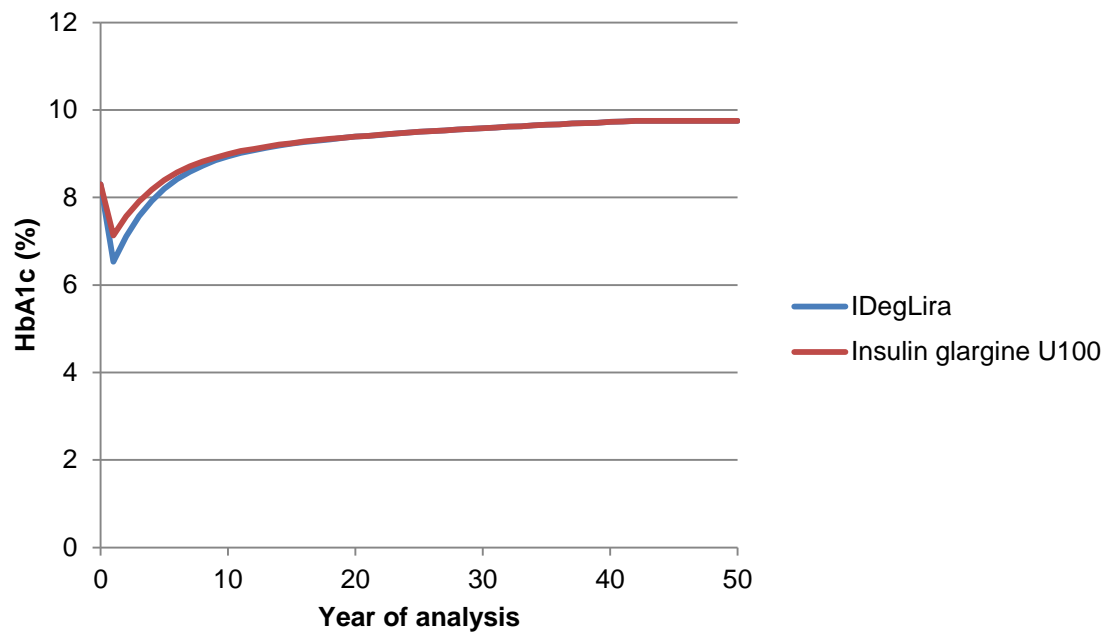

HbA1c, glyated hemoglobin.
